# Supplementary material for: Noise in raw data of magnetic observatories
Source: Copernicus journal article supplement (doi:10.5194/gi-2017-10), 2017-05-10
Supplement: Supplementary file [file gi-2017-10-RC2_Answer_20170727.pdf › gi-2017-10-RC2_Answer_20170727.pdf]

Interactive comment on “Noise in raw data of magnetic observatories” by Sergey Y. Khomutov et al.

C. Turbitt (Referee)

Dear Chris,

5 Thank you for your comment.

Comment: Page 7, line 17: (Auster et al., 2008) should read (Auster et al., 2007)

Reply: We corrected this our mistake.

With my best regards,  
Sergey Khomutov
